# Supplementary material for: Chiral Covalent-Organic Framework MDI-β-CD-Modified COF@SiO2 Core–Shell Composite for HPLC Enantioseparation
Source: MDPI journal article supplement (doi:10.3390/molecules28020662), 2023-01-09

# Supporting Information

## Chiral Covalent-Organic Framework

### MDI- $\beta$ -CD-Modified COF@SiO<sub>2</sub> Core-Shell Composite for HPLC Enantioseparation

Xiaoyan Ran, Ping Guo, Caifang Liu, Yulan Zhu, Cheng Liu, Bangjin Wang \*, Junhui Zhang, Shengming Xie \* and Liming Yuan

Department of Chemistry, Yunnan Normal University, Kunming 650500, China

\* Correspondence: wangbangjin711@163.com (B.W.);

xieshengming\_2006@163.com (S.X.)

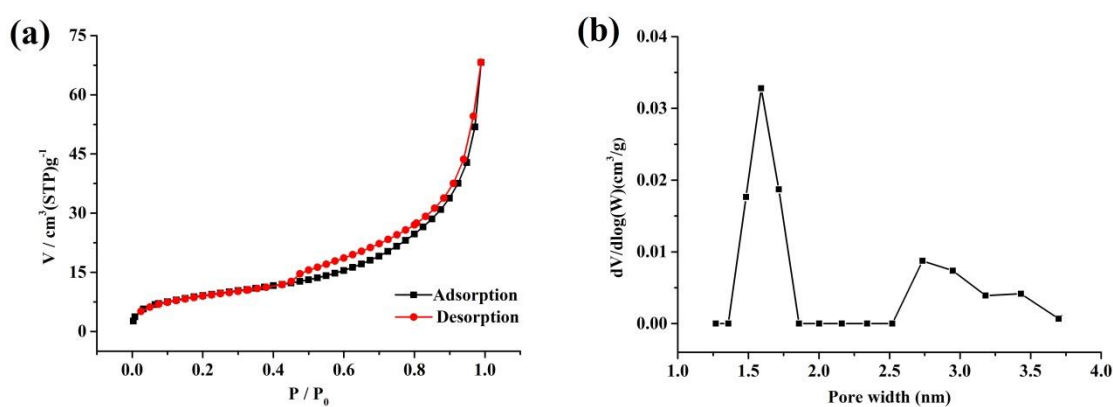

**Figure S1.** (a) N<sub>2</sub> adsorption-desorption isotherms of MDI- $\beta$ -CD-modified COF; (b) Pore size distribution of MDI- $\beta$ -CD-modified COF

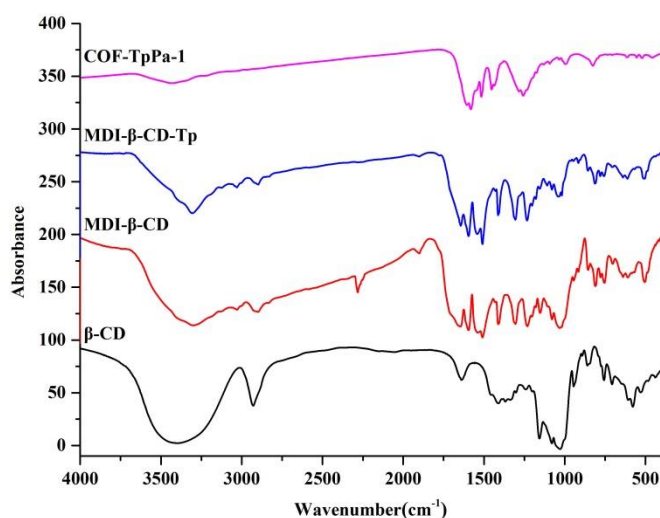

**Figure S2.** FT-IR spectra of  $\beta$ -CD, MDI- $\beta$ -CD, MDI- $\beta$ -CD-Tp, and COF-TpPa-1

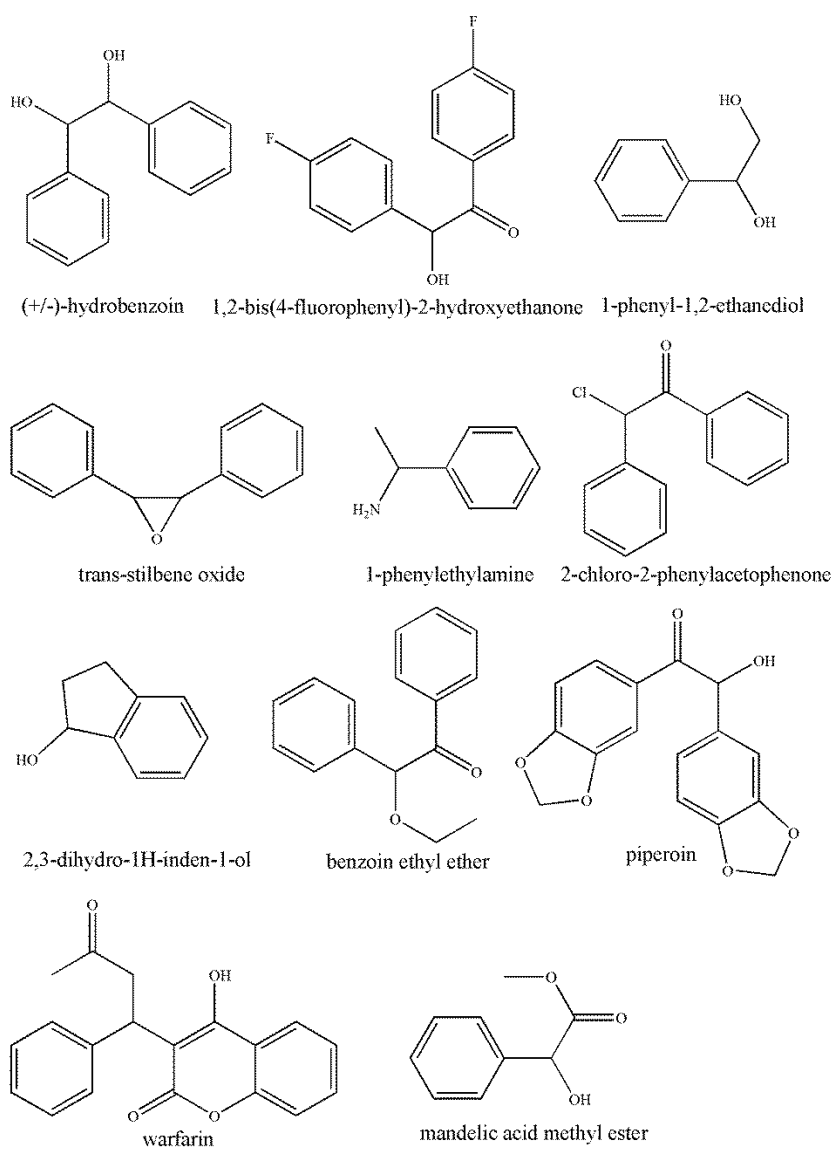

**Figure S3.** Structures of the chiral compounds separated on the MDI- $\beta$ -CD-modified COF@SiO<sub>2</sub>-packed column

**Table S1.** Separation of racemic compounds on the MDI- $\beta$ -CD-modified COF@SiO<sub>2</sub>-packed column (column A), Chiralpak AD-H column, and  $\beta$ -CD-COF@SiO<sub>2</sub>-packed column (column B)

| Racemates                                              | Separation factor( $\alpha$ ) |      |      | Resolution(Rs) |                |                |
|--------------------------------------------------------|-------------------------------|------|------|----------------|----------------|----------------|
|                                                        | A                             | AD-H | B    | A              | AD-H           | B              |
| (+/-)-hydrobenzoin <sup>a</sup>                        | 1.44                          | 1.00 | 2.35 | 1.48           | — <sup>d</sup> | 1.77           |
| 1,2-bis(4-fluorophenyl)-2-hydroxyethanone <sup>a</sup> | 1.28                          | 1.12 | 1.00 | 1.34           | 2.21           | — <sup>d</sup> |
| 1-phenyl-1,2-ethanediol <sup>b</sup>                   | 1.75                          | 1.00 | 1.00 | 2.17           | — <sup>d</sup> | — <sup>d</sup> |
| trans-stilbene oxide <sup>a</sup>                      | 3.15                          | 3.12 | 2.37 | 3.26           | 5.78           | 1.65           |
| 1-phenylethylamine <sup>a</sup>                        | 1.55                          | 1.00 | 1.00 | 1.04           | — <sup>d</sup> | — <sup>d</sup> |
| 2-chloro-2-phenylacetophenone <sup>a</sup>             | 1.66                          | 1.17 | 1.00 | 0.97           | 2.59           | — <sup>d</sup> |
| 2,3-dihydro-1H-inden-1-ol <sup>a</sup>                 | 1.35                          | 1.06 | 1.00 | 1.14           | 1.26           | — <sup>d</sup> |
| benzoin ethyl ether <sup>b</sup>                       | 1.54                          | 1.15 | 1.00 | 1.01           | 2.51           | — <sup>d</sup> |
| piperoin <sup>a</sup>                                  | 2.00                          | 1.26 | 1.00 | 2.15           | 2.64           | — <sup>d</sup> |
| warfarin <sup>c</sup>                                  | 2.11                          | 1.25 | 1.00 | 1.60           | 2.61           | — <sup>d</sup> |
| mandelic acid methyl ester <sup>c</sup>                | 1.19                          | 1.08 | 1.00 | 0.57           | 1.77           | — <sup>d</sup> |

Separation conditions: <sup>a</sup>mobile phase, n-hexane/isopropanol (90/10, v/v) as the mobile phase for columns A and AD-H. <sup>b</sup>mobile phase, n-hexane/isopropanol (80/20, v/v) as the mobile phase for columns A and AD-H. <sup>c</sup>mobile phase, n-hexane/isopropanol (70/30, v/v) as the mobile phase for columns A and AD-H; flow rate: 0.1 mL min<sup>-1</sup>; column temperature: 25 °C. <sup>d</sup>Cannot be separated.

**Table S2.** Eleven pairs of racemic compounds separated on the MDI- $\beta$ -CD-modified COF@SiO<sub>2</sub>-packed column and Chiralpak AD-H column (separation conditions as shown in Table S1)

| Racemates          | Chiralpak AD-H                                                                      | MDI- $\beta$ -CD-modified COF@SiO <sub>2</sub> -packed column                         |
|--------------------|-------------------------------------------------------------------------------------|---------------------------------------------------------------------------------------|
| (+/-)-hydrobenzoin | 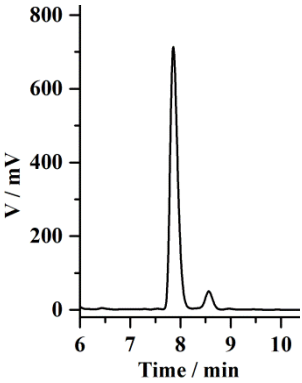 |  |

|                                                         |                                                                                     |                                                                                       |
|---------------------------------------------------------|-------------------------------------------------------------------------------------|---------------------------------------------------------------------------------------|
| <p><b>1,2-bis(4-fluorophenyl)-2-hydroxyethanone</b></p> | 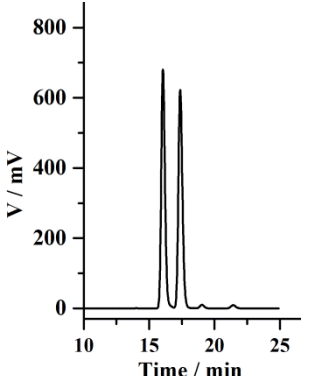   |    |
| <p><b>1-phenyl-1,2-ethanediol</b></p>                   |   |   |
| <p><b>trans-stilbene oxide</b></p>                      |  |  |
| <p><b>1-phenylethylamine</b></p>                        |  |  |

|                                             |                                                                                     |                                                                                       |
|---------------------------------------------|-------------------------------------------------------------------------------------|---------------------------------------------------------------------------------------|
| <p><b>2-chloro-2-phenylacetophenone</b></p> | 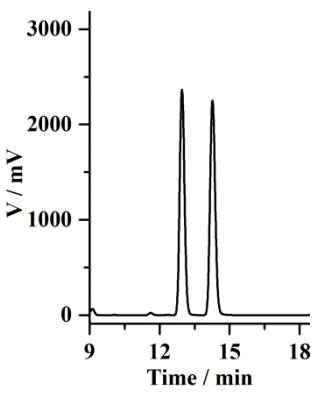   |    |
| <p><b>2,3-dihydro-1H-inden-1-ol</b></p>     |   |   |
| <p><b>benzoin ethyl ether</b></p>           |  |  |
| <p><b>piperoin</b></p>                      |  |  |

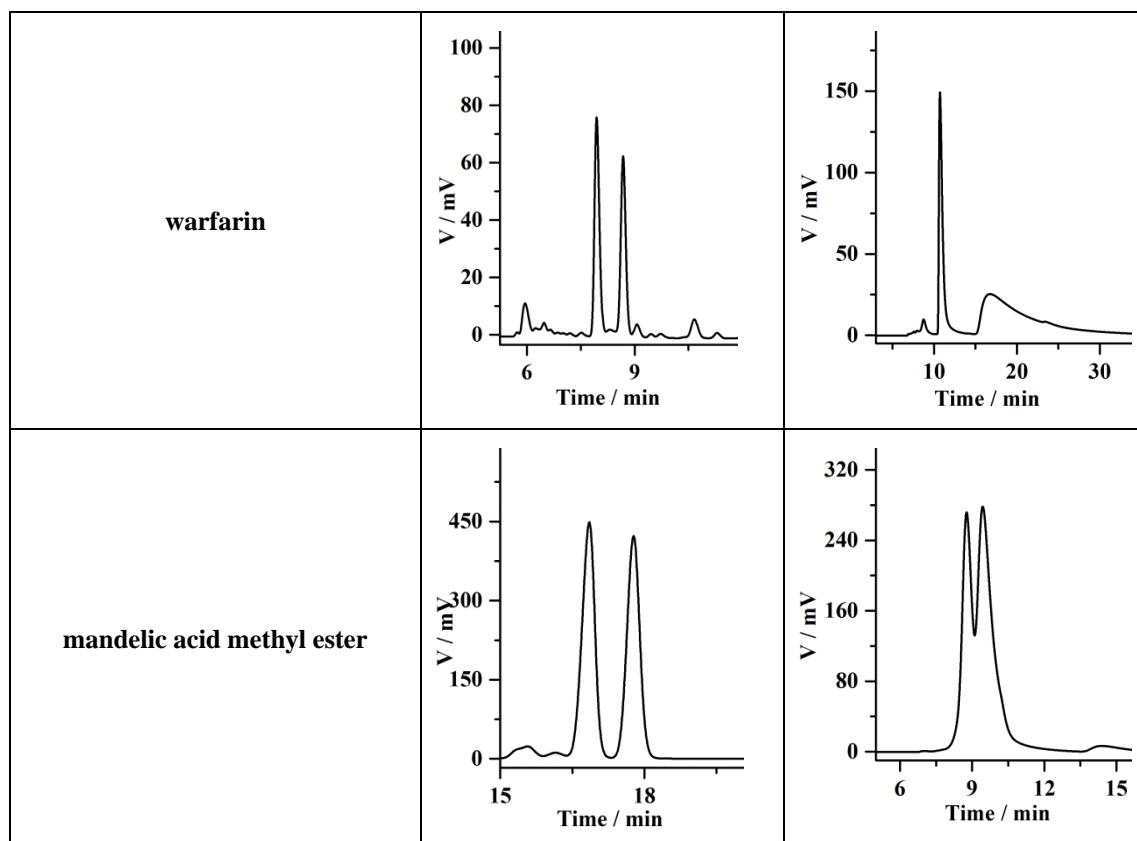

Supplement: s1 [file s1]
